# Supplementary material for: Multimodal spectroscopic investigation of the conformation and local environment of biomolecules at an electrified interface
Source: Royal Society of Chemistry journal article supplement (doi:10.1039/d0tb01158d), 2020-01-01
Supplement: d0tb01158d1.pdf [file d0tb01158d1.pdf]

Supporting information for “**Multimodal spectroscopic investigation of the conformation and local environment of biomolecules at an electrified interface**”

Sasha A. Moonitz, Noah Shepard, Rodrigo Noriega

*University of Utah, Department of Chemistry, 315 S. 1400 E.*

*Salt Lake City, UT 84112*

Email: [noriega@chem.utah.edu](mailto:noriega@chem.utah.edu); phone: (801) 579-7979

**Contents**

|                                                                                                                             |          |
|-----------------------------------------------------------------------------------------------------------------------------|----------|
| Materials and sample preparation .....                                                                                      | Page S2  |
| Optical characterization of ITO films .....                                                                                 | Page S3  |
| SPR experimental setup .....                                                                                                | Page S4  |
| Modeling of SPR response and sensitivity estimation .....                                                                   | Page S5  |
| Electrochemical flow cell setup .....                                                                                       | Page S6  |
| Time- and polarization-resolved fluorescence of polypeptide adsorbates .....                                                | Page S8  |
| Morphology of adsorbed polypeptide layer .....                                                                              | Page S9  |
| Assessing the hydration state of poly-L-lysine adsorbates .....                                                             | Page S10 |
| Fourier-transform infrared spectroscopy of PLL samples .....                                                                | Page S11 |
| Time-resolved fluorescence lifetime and anisotropy of polypeptide adsorbates at an electrified solid/liquid interface ..... | Page S12 |
| Effect of ionic strength on interfacial dynamics .....                                                                      | Page S16 |
| Safety and Hazards statement .....                                                                                          | Page S17 |
| References .....                                                                                                            | Page S18 |

**Materials and sample preparation.** Details on the deposition of ITO films, preparation of buffers and sample solutions are provided below.

**Deposition of ITO films.** The optoelectronic properties of magnetron sputtered ITO thin films are strongly dependent on processing conditions.<sup>1–5</sup> Our sensors were grown on clean sapphire substrates (double-side polished, c-cut, 2.54 cm x 2.54 cm x 0.5 mm, University Wafer) via DC magnetron sputtering (Denton Discovery 18) at room temperature and with a DC power of 50 W. The vacuum chamber was evacuated to  $1.9 \times 10^{-6}$  Torr before it was pumped with a 99:1 argon/oxygen gas mixture to  $4.34 \times 10^{-3}$  Torr. Deposition was carried out for a variable time period to achieve desired film thickness. After deposition, ITO films were annealed ex-situ under nitrogen gas in a rapid thermal annealing oven (Allwin AccuThermo AW610) at a temperature of 350° C for 2 minutes. The resulting ITO films have a low surface roughness (**Fig. S1**), with a maximum root-mean-square value ( $R_q$ ) of 2.15 nm – most substrates have  $R_q \sim 1$  nm.

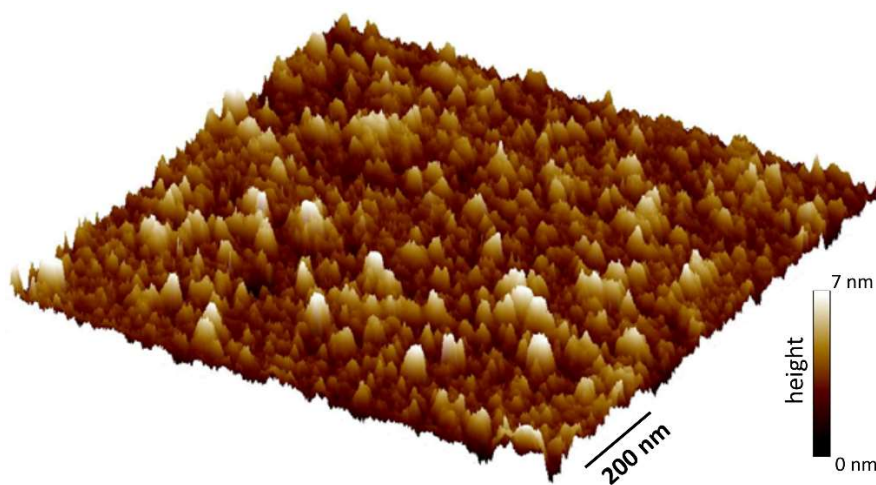

**Figure S1.** Atomic force microscopy image shows the topography of a representative section ( $1 \mu\text{m} \times 1 \mu\text{m}$ ) of a sputtered ITO film, with  $R_q = 0.93$  nm.

**Buffer solutions.** Britton-Robinson buffer (BRB) solutions were prepared at pH=7 and pH=11 and constant ionic strengths (50 mM - 1.5 M).<sup>6</sup> Equimolar amounts of phosphoric acid (Sigma-Aldrich CAS 7664-38-2), glacial acetic acid (Sigma-Aldrich CAS 64-19-7),

and boric acid (Fisher Scientific CAS 10043-35-3) were dissolved in HPLC grade water. For pH=11 buffers, 4.1 mM of each acid were used; 4.5 mM were used for pH=7 buffers. The pH of each buffer was monitored with a temperature calibrated pH probe (Fisherbrand Accumet AE150) and 0.1 M sodium hydroxide was added until the desired pH was obtained. The ionic strengths of each solution were determined by accounting for the ionic product of water, the formal concentrations of each acid and sodium hydroxide at each pH, using the acid dissociation constants (**Table S1**) to determine the fractional compositions of each ionic species at each pH. NaCl was used to maintain a constant ionic strength between buffers.

| Acid       | K <sub>1</sub>           | K <sub>2</sub>           | K <sub>3</sub>            |
|------------|--------------------------|--------------------------|---------------------------|
| Acetic     | 1.754 x 10 <sup>-5</sup> | —                        | —                         |
| Phosphoric | 6.92 x 10 <sup>-3</sup>  | 6.17 x 10 <sup>-8</sup>  | 4.786 x 10 <sup>-13</sup> |
| Boric      | 5.37 x 10 <sup>-10</sup> | 3.98 x 10 <sup>-13</sup> | 5.01 x 10 <sup>-14</sup>  |

**Table S1.** Acid dissociation constants used to determine fractional compositions of ionic species present in Britton-Robinson buffers of varying pH.<sup>7</sup>

**Polypeptide solutions.** Poly-L-lysine hydrochloride (PLL, Sigma-Aldrich CAS # 26124-78-7, m.w. > 30 kDa) was dissolved in pH 11 BRB solutions at a concentration of 1 mg/mL and used for adsorption to the ITO surface. For samples used in fluorescence experiments, an identical procedure was employed but with fluorescein isothiocyanate labelled poly-L-lysine (FITC-PLL, Sigma-Aldrich SKU P3069, m.w. 30 – 70 kDa).

**Optical characterization of ITO films.** Spectroscopic ellipsometry measurements were conducted immediately after film deposition. This allowed validation of successful thin film deposition prior to incorporation into electrochemical, fluorescence, or plasmonic experiments. To avoid artifacts in the data, the back side of the substrate was sanded

into a diffusive surface. Due to the destructive nature of this characterization step, a sacrificial glass substrate was added to all film deposition runs. Data was collected with a J.A. Woollam variable-angle spectroscopic ellipsometry (VASE) instrument; analysis was performed with the instrument's onboard analysis software. Standard materials parameters were used for Cauchy models of the glass substrate and air interface. A Drude model was employed for the ITO film.<sup>8-10</sup> The ITO film thickness was allowed to vary in the fitting routine, and thickness values were in agreement with profilometry measurements. Materials parameters obtained for ITO films were a plasma frequency  $\omega_p = 2.2 - 3.1 \times 10^{15}$  Hz and damping coefficient  $\Gamma = 2.5 \times 10^{14}$  Hz. These plasma frequencies correspond to a free carrier density  $n_e = 0.5 - 1.1 \times 10^{21}$  cm<sup>-3</sup>. A typical spectroscopic ellipsometry data set is shown in **Fig. S2**.

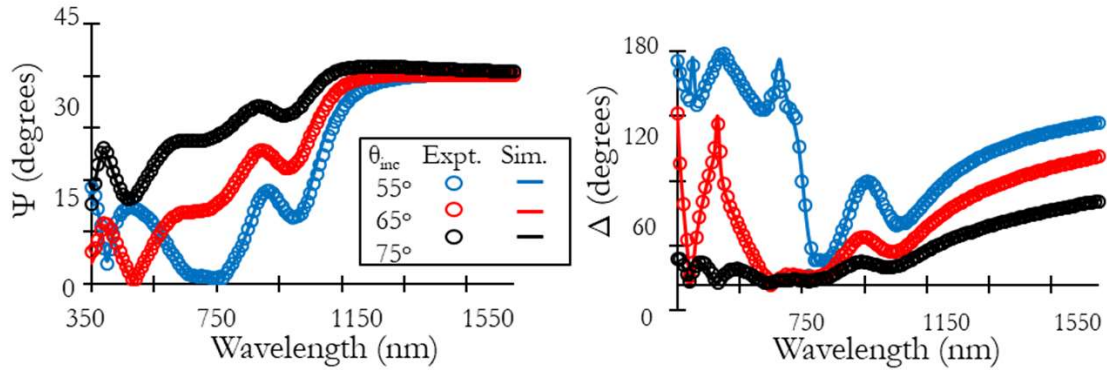

**Figure S2. Spectroscopic ellipsometry measurements on glass/ITO/air film stacks** can determine the optical constants of sputtered ITO films, which are then fit to a Drude model.

**SPR experimental setup.** Reflectivity as a function of incidence angle was measured using CW and pulsed light sources (4.5 mW of  $\lambda_{CW}=1550$  nm Thorlabs LDM1550; or 100-200  $\mu$ W of  $\lambda_{fs}=2500$  nm from a TOPAS Prime OPA pumped by a Coherent Astrella, 5 kHz repetition rate, 40 fs pulse duration). Incident light was directed to the SPR chips using SF11 right-angle coupling prisms glued to the back side of the sapphire substrate with UV-cured high refractive index epoxy (Norland NOA170). Fully assembled SPR chips

were mounted onto a homebuilt flow cell made with chemically resistant material (Kel-F) and placed on a rotation stage; detection optics are mounted on a concentric rotation stage for  $\theta$ -2 $\theta$  scans. The *p*-polarized incident light was focused onto the SPR chip through the coupling prism with a Au spherical mirror with  $f=125$  mm focal length. The reflected beam was measured with a biased InGaAs photodiode (Thorlabs DET10D2) whose output was fed to a lock-in amplifier (Ametek Signal Recovery) interfaced via a data acquisition card (National Instruments). A beam chopper is included in the SPR line to enable lock-in detection, and a sapphire beam sampler is used to split off a small portion of the incident beam, which is directed to an identical detection setup as the reflected beam and serves as a reference to eliminate fluctuations in laser power.

**Modeling of SPR response and sensitivity estimation.** Modeling of surface plasmon resonances was performed using the Winspall software package by Res-Tec, which employs the Fresnel formalism to calculate reflectivity curves of a planar film stack with dielectric properties and thicknesses that are either user-defined or least-squares fitted to data. When performing a fitting routine, only parameters corresponding to the ITO layer were allowed to vary; material properties for sapphire, SF11 glass, air, water, and methanol were fixed at reported literature values.<sup>11–15</sup> A small (<2 deg.) systematic deviation in experimental vs. predicted angles is due to an offset in the rotation axis and geometric center of the prism-substrate assembly, as well as minor angular deviations during prism mounting. After fitting the thickness and dielectric properties of the ITO film using their SPR response over a wide range of angles and in contact with multiple dielectric media, these parameters were fixed for constant-angle SPR reflectivity measurements.

99 Using the change in the SPR response for the same ITO film and different dielectric  
100 media, it is possible to estimate the sensitivity of our experiments to changes in the  
101 refractive index of the sample. Since probing condensed phases is the primary interest,  
102 the SPR reflectivity at the ITO/H<sub>2</sub>O and ITO/MeOH are compared. The difference in the  
103 measured reflectivity  $\Delta R = R_{\text{MeOH}} - R_{\text{H}_2\text{O}}$  is divided by the difference in the sample  
104 refractive index  $\Delta n = n_{\text{MeOH}} - n_{\text{H}_2\text{O}}$  to approximate the sensitivity  $dR/dn \approx \Delta R/\Delta n$ . As  
105 expected given the good agreement of individual reflectivity curves with Fresnel models,  
106 observations and predictions for sensitivity match quite well (**Fig. S3**). The maximum  
107 measured sensitivity is  $\Delta R/\Delta n = 4.75$ . Our setup can routinely measure reflectivity values  
108 with a resolution better than  $10^{-3}$ , which would correspond to resolvable changes in  
109 refractive index of  $2 \times 10^{-4}$  or better.

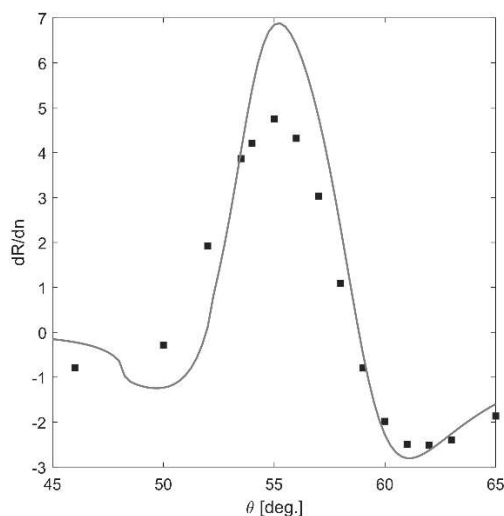

**Figure S3. Estimation of the SPR sensitivity** by considering the difference in reflectance for two simple dielectric media (water and methanol) measured sequentially in the same ITO SPR chip. The difference in reflectivity divided by the difference in refractive index is shown (experimental data as markers, model as continuous line).

110 **Electrochemical flow cell setup.** ITO chips were mounted in a custom three-electrode  
111 electrochemical flow cell (**Fig. S4**) driven by a bipotentiostat (CH Instruments CHI700E).

112 The ITO sensors could be either mounted freely (TRPL) or bonded to a high refractive  
 113 index prism (SPR). Copper tape was adhered to the surface of the ITO thin film, enabling  
 114 its wiring as the working electrode. A 2 mm diameter platinum wire served as the counter  
 115 electrode. A 2 mm diameter Ag wire was soaked in a sodium hypochlorite solution and  
 116 used as a quasi-reference electrode (QRE). The open circuit potential of the Ag QRE was  
 117 measured against a Ag/AgCl reference electrode (CH Instruments CHI111) and found to  
 118 maintain a potential of -67 mV in saturated KCl solutions. During potential-driven  
 119 adsorption experiments, voltage was applied to the ITO working electrode for 15 minutes,  
 120 after which the SPR signal was recorded and compared to the reference signal when no  
 121 potential was applied. The sample solution was then flowed and the adsorption and data  
 122 collection procedure were repeated for all potentials studied. Time-resolved  
 123 photoluminescence studies examined the fluorescent signal of FITC-PLL already  
 124 adsorbed on an ITO substrate.

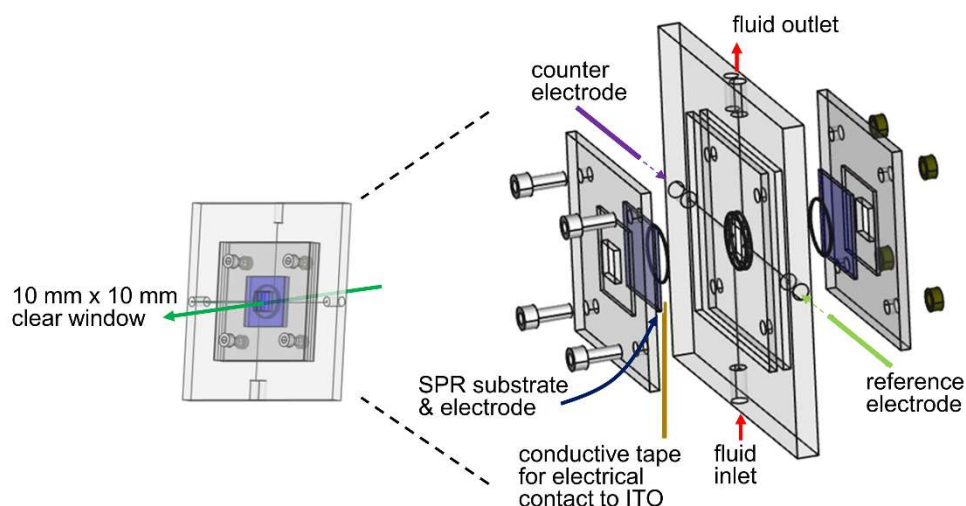

**Figure S4. Assembly of our electrochemical flow cell** designed to couple electrochemical and spectroscopic characterization of interfacial processes. Wiring connecting the working (ITO), counter (Pt), and reference (Ag/AgCl) electrodes to the bipotentiostat is not shown.

**Time- and polarization-resolved fluorescence of polypeptide adsorbates.** Excitation

pulses were 150  $\mu$ W of 490 nm excitation from the second harmonic of a tunable Ti:sapphire laser (Coherent Chameleon Ultra II, 80 MHz, <200 fs pulse duration) directed to the sample with a 530 nm long-pass dichroic, then focused with a single 75 mm focal length aspheric lens. Fluorescence was collected with the same lens, filtered with the long-pass dichroic and an additional long-pass filter (580 nm cutoff). Fluorescence was split into two orthogonal polarization channels and directed with large core optical fibers to identical single-photon Si photodiodes (MPD Systems) whose signal was routed to a TCSPC module (PHR 800 and PicoHarp 300, PicoQuant). Data was acquired in a time-tagged time-resolved (T3) mode that incorporates full tagging of photon detection events with micro time (excitation-emission delay, 0-12.5 ns) and macro time (experimental frame for synchronization to stimuli). Identical ITO substrates were loaded onto a homebuilt flow cell; no SPR coupling prism was attached for these fluorescence experiments. A solution of FITC-PLL (1 mg/mL in pH 11.48 BRB,  $I=1.5$  M) was flowed into the sample cell and the interfacial potential was stepped between -0.5–1.0 V to undergo the same adsorption monitored with SPR experiments. The sample cell was flushed with HPLC water several times to ensure that the only FITC-PLL remaining in the flow cell was that which had adsorbed to the ITO surface, as determined when no change in detected fluorescence was observed after 2 consecutive rinses (**Fig. S5**). Fluorescence data was collected for 15 minutes at each of the experimental conditions (pH, voltage) for which the first 2 minutes were in open circuit, then 12 minutes of applied potential, followed by 1 minute at open circuit. Buffer solution was flushed through for 5 minutes in between each set of experiments.

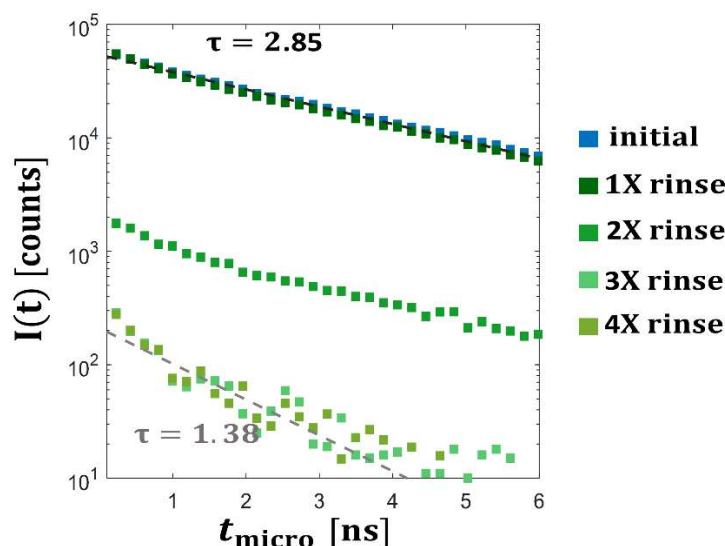

**Figure S5. Fluorescence decay traces of FITC-PLL during adsorption and subsequent rinses** show a decrease to a steady state corresponding to signal from the adsorbed film and not residual sample in solution. A substantial decrease in fluorescence lifetime is also observed for bulk vs. adsorbed species.

**Morphology of adsorbed polypeptide layer.** Following the electric-field assisted deposition of PLL onto the ITO surface, atomic force microscopy reveals a partial coverage of the ITO with PLL islands of variable height (**Fig. S6**). The volume fraction of PLL,  $\Phi_{\text{PLL}}$ , can be calculated using AFM height maps as the volume between the topographical surface and the mean ITO baseline. For two nominally identical samples, a layer height of 75-80 nm above the mean ITO level was obtained. In each of these samples, the average PLL volume fraction over the entire AFM scans was  $\Phi_{\text{PLL}} \sim 3\%$ . However, considering the variability of coverage (**Fig. S6**), it is illustrative to calculate the PLL volume fraction in the adhered layer within smaller regions ( $2 \times 2 \mu\text{m}$ ). With these local averages, a noticeable population of regions with a PLL volume fraction  $\Phi_{\text{PLL}} \sim 8.5\%$  can be observed.

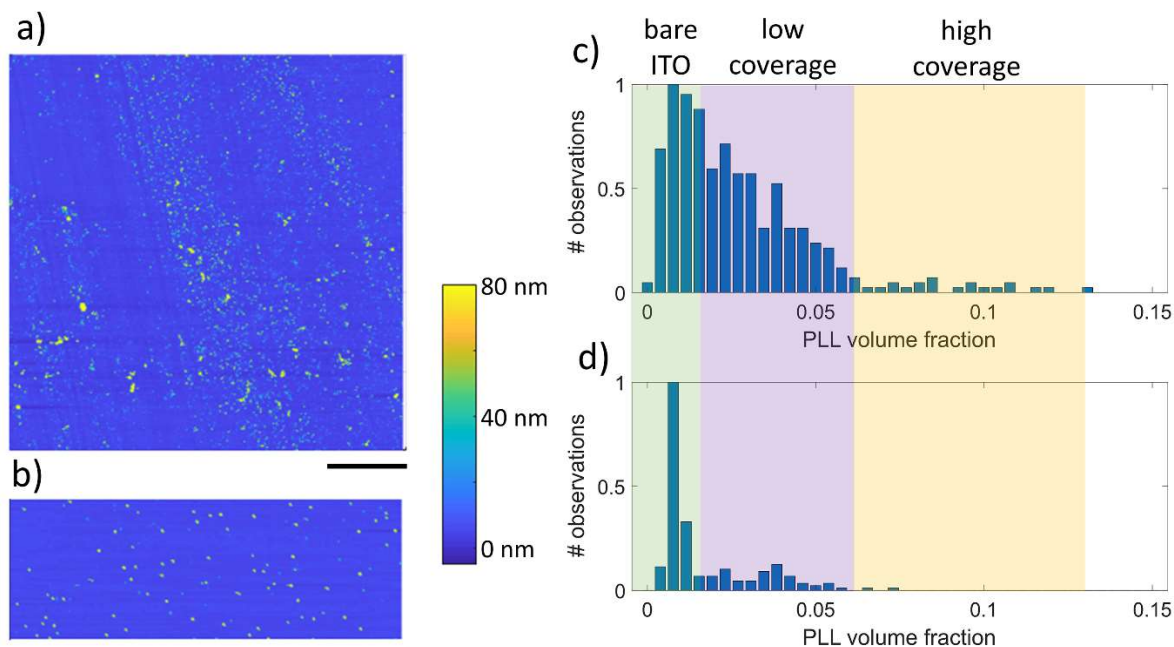

**Figure S6. Atomic force microscopy image of PLL adsorbates** atop ITO after electric-field assisted deposition from solution. Scale bar = 10  $\mu\text{m}$ . Pseudo-color representations of the sample topography (on the same color scale) are shown on panels (a,b) on the left. A histogram of local PLL volume fractions (in  $2 \times 2 \mu\text{m}$  squares) for the two samples ( $a \rightarrow c$ ,  $b \rightarrow d$ ). Shaded areas denote those regions with high ( $\langle \Phi_{\text{PLL}} \rangle \sim 8.5\%$ ) and low ( $\langle \Phi_{\text{PLL}} \rangle \sim 4\%$ ) PLL coverage, as well as those where mostly bare ITO is observed ( $\langle \Phi_{\text{PLL}} \rangle < 1\%$ ).

**Assessing the hydration state of PLL adsorbates.** To model the SPR reflectivity upon sample adsorption, an interfacial layer was inserted in the model atop the ITO surface with a thickness (75-80 nm) and coverage (3-8.5%) that are representative of those measured for PLL adsorbates (**Fig. S6**). With this geometry, the layer's thickness and dielectric properties were optimized to match the observed change in reflectivity ( $h=80 \text{ nm}$ ,  $n_{\text{boundary}}=1.304$ ). If the refractive index of the mixed layer is approximated as the weighted average of its components, the refractive index of the PLL adsorbates can be estimated in the range  $n_{\text{PLL}}=1.8\text{-}2.7$  (depending on the PLL volume fraction). This range for  $n_{\text{PLL}}$  is in agreement with values reported for poly-alanine nanostructures ( $n_{\text{FFF}}=1.53 @ 840 \text{ nm}$ )<sup>16</sup>, considering that the molar residue refractivity of lysine is twice

as large as that of alanine<sup>17</sup> and refractive indices decrease slowly at longer wavelengths in the absence of resonances.

The small changes in reflectivity observed upon perturbation of the interface are easily detected when the rotation stage and all detection optics are kept fixed. However, these changes would be smaller than those resulting from positioning errors in the rotation stage, which prevents the acquisition of full SPR curves as a function of continually changing interfacial conditions. Thus, fixed-angle measurements provide useful information regarding the interfacial layer but rely on assumptions on its properties – e.g., minimal changes in hydration while at constant pH. In this way, we account for the average thickness of the adsorbed PLL layer assuming various hydration levels. For the minimum (0.188) and maximum (0.193) values of reflectivity observed, average thickness of the PLL adsorbed layer would be in the 175-200 nm range (adsorbates with 10% hydration) or 210-235 nm range (adsorbates with 20% hydration).

**Fourier-transform infrared spectroscopy of PLL samples.** While the transparency window of sapphire extends to  $\sim 6 \mu\text{m}$ , large path lengths through aqueous solutions prevent the use of standard FTIR transmission measurements. To verify that our polypeptide samples display the expected conformations in dry and solvated environments, we performed FTIR absorbance experiments in transmission geometry for dry PLL films atop blank sapphire substrates, and for concentrated PLL solutions in methanol sandwiched between sapphire windows using a  $6 \mu\text{m}$  spacer (**Fig. S7**). While these conditions are different from those used in SPR and TRPL experiments, they suggest that the poly-L-lysine samples used ( $\sim 200$  residues long chains) experience

similar conformational changes as those previously reported in the literature. Data were collected with a Thermo Scientific Nicolet iS50 spectrometer (transmission configuration).

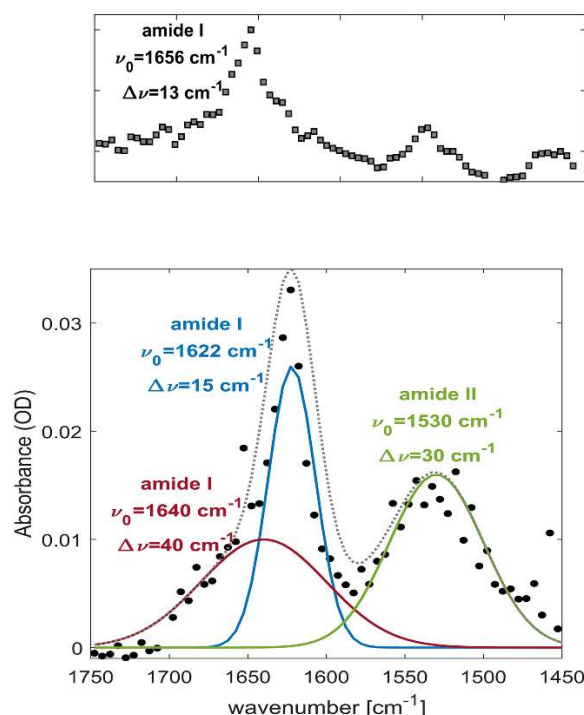

**Figure S7.** FTIR spectra of dry PLL on sapphire show peaks in the amide I and II regions. The amide I band can be used to assess secondary structure. In a dry film (bottom panel), peaks at  $1622 \text{ cm}^{-1}$  and  $1640 \text{ cm}^{-1}$  are characteristic of  $\beta$ -sheets. Top panel shows data for concentrated PLL solution in methanol with 63 mM of HCl, whose peak at  $1656 \text{ cm}^{-1}$  is characteristic of  $\alpha$ -helices.<sup>16</sup>

### **Time-resolved fluorescence lifetime and anisotropy of polypeptide adsorbates at an electrified solid/liquid interface.**

The raw data for the TRPL experiments performed in this work are photon detection events, tagged by channel (V or H polarization) and their detection time (micro time and macro time). Binning these data by channel and macro time allows for brightness trends. Histograms of micro time for a particular channel contain fluorescence lifetime decay data. Differences in arrival time for each channel due to different optical and/or electronic path lengths are accounted for with a horizontal shift.

Differences in collection efficiency for V/H polarization channels make it is necessary to equalize the counts in these channels before calculating rotationally averaged

202 fluorescence decays traces and time-resolved fluorescence anisotropy. This is done by  
 203 the tail-matching method, where a specific sample is approximated as freely-diffusing  
 204 chromophore and its long-time values of V/H-polarized fluorescence are matched with a  
 205 scaling factor  $g$  for one of them so that the ensuing anisotropy decays to zero. Because  
 206 the V/H channel equalization factor  $g$  is an instrument variable, it is kept fixed for all other  
 207 samples. In our setup,  $g=0.205$ . The resulting rotationally averaged fluorescence decay  
 208 and time-resolved fluorescence anisotropy are given by **Eq. S1** and **S2**, respectively.

$$209 \quad I_{tot}(t) = I_V(t) + 2g \cdot I_H(t) \quad \text{Eq. S1} \quad r(t) = \frac{I_V(t) - g \cdot I_H(t)}{I_V(t) + 2g \cdot I_H(t)} \quad \text{Eq. S2}$$

210 The tail-matched data are binned as a function of macro time into 90 s periods, and the  
 211 micro time histograms for photons detected within that observation window are used to  
 212 compute fluorescence lifetime and time-resolved anisotropy traces, which are fitted as  
 213 single exponential decays with a nonlinear least-squares routine. Typical traces are  
 214 shown in **Fig. S8**. Due to the small amount of sample, the resulting count rates are low  
 215 (~35-150 cps) which prevented accurate determination of fitted parameters in a small  
 216 subset of data points (observations at  $t_{macro} > 800$  s in pH=7 at  $\Delta V_{ITO}=750$  mV and in pH=11  
 217 at  $\Delta V_{ITO}=1$  V, both for  $I=1.5$  M).

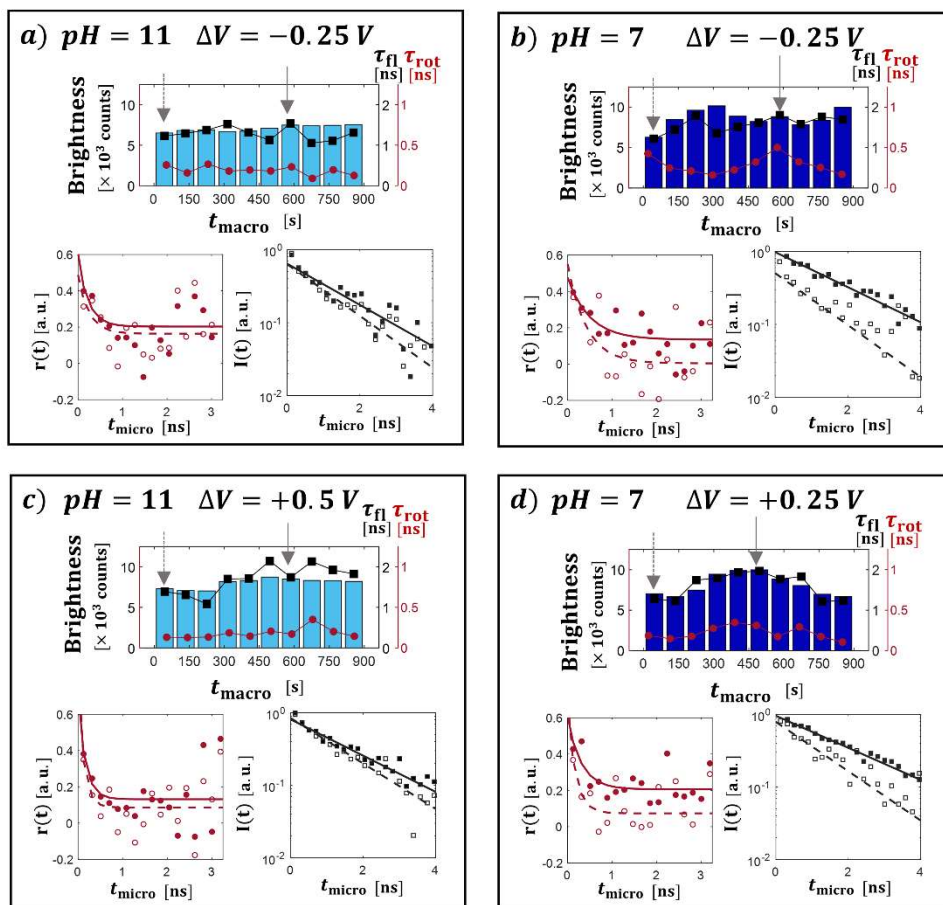

**Figure S8.** Representative examples of time-resolved fluorescence  $I(t)$  and time-resolved fluorescence anisotropy  $r(t)$  of FITC-PLL adsorbed on ITO substrates, as a function of the buffer pH and interfacial voltage. For each pH and  $\Delta V$  set (a,b,c,d), two time points are chosen – one depicting the early dynamics before voltage is applied and another time point after the interfacial potential has been applied (denoted by gray arrows). The no-voltage dynamics are shown by empty markers (data) and dashed lines (fit); solid markers and solid lines depict the data and fit for the dynamics under applied voltage, respectively.

218 The correlation between brightness and photophysical parameters is supported by the  
 219 trends shown in **Fig. S9**. The sample brightness shows a clear positive correlation with  
 220 fluorescence lifetime  $\tau_{fl}$  and with the asymptotic fluorescence anisotropy value  $r(\infty)$ .  
 221 Brightness does not show a noticeable correlation with either rotational diffusion time  
 222 scale  $\tau_{rot}$  nor with the initial fluorescence anisotropy value  $r(0)$ .

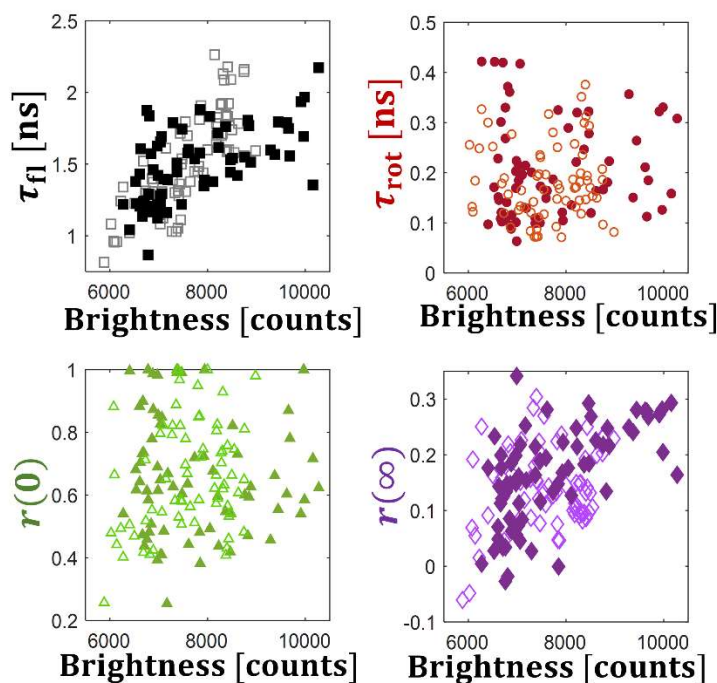

**Figure S9. Fluorescence brightness** shows a noticeable positive correlation with fluorescence lifetime and asymptotic anisotropy value, and no correlation with rotational diffusion time or initial anisotropy value. Filled markers correspond to data in pH=7 buffer, empty markers are pH=11 data.

223 The dependence of mean brightness and the presence of fluctuations as a function of  
 224 voltage display a discernible voltage trend at pH=11, and weak correlation with voltage at  
 225 pH=7 (**Fig. S10**).

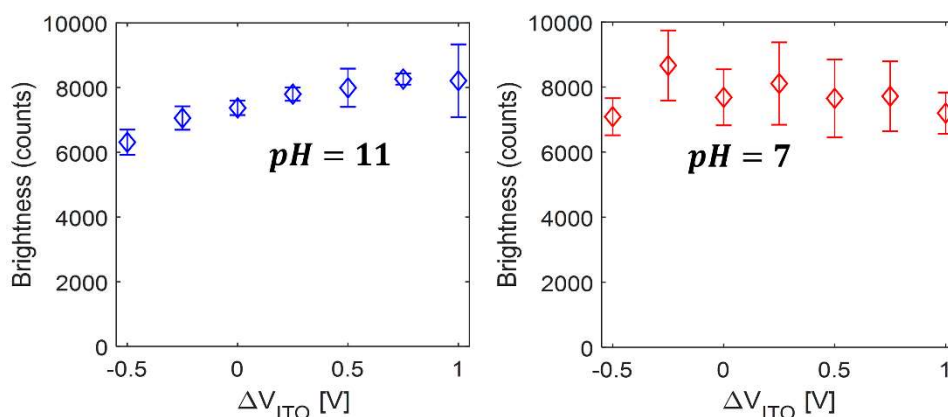

**Figure S10. Voltage dependent mean brightness and its standard deviation** show a slight increase in brightness with more positive voltages at pH=11, with negligible fluctuations. At pH=7, the fluctuations are much more significant, and no trend is observed for their brightness.

226 **Effect of ionic strength on interfacial dynamics.** To investigate the role of ionic  
 227 strength in the observed trends, the time-resolved fluorescence experiments described  
 228 above were repeated after replacing the solution in the flow cell with buffered electrolytes  
 229 with an ionic strength of 50 mM, for both pH values (pH=11 and pH=7, **Fig. S11**).

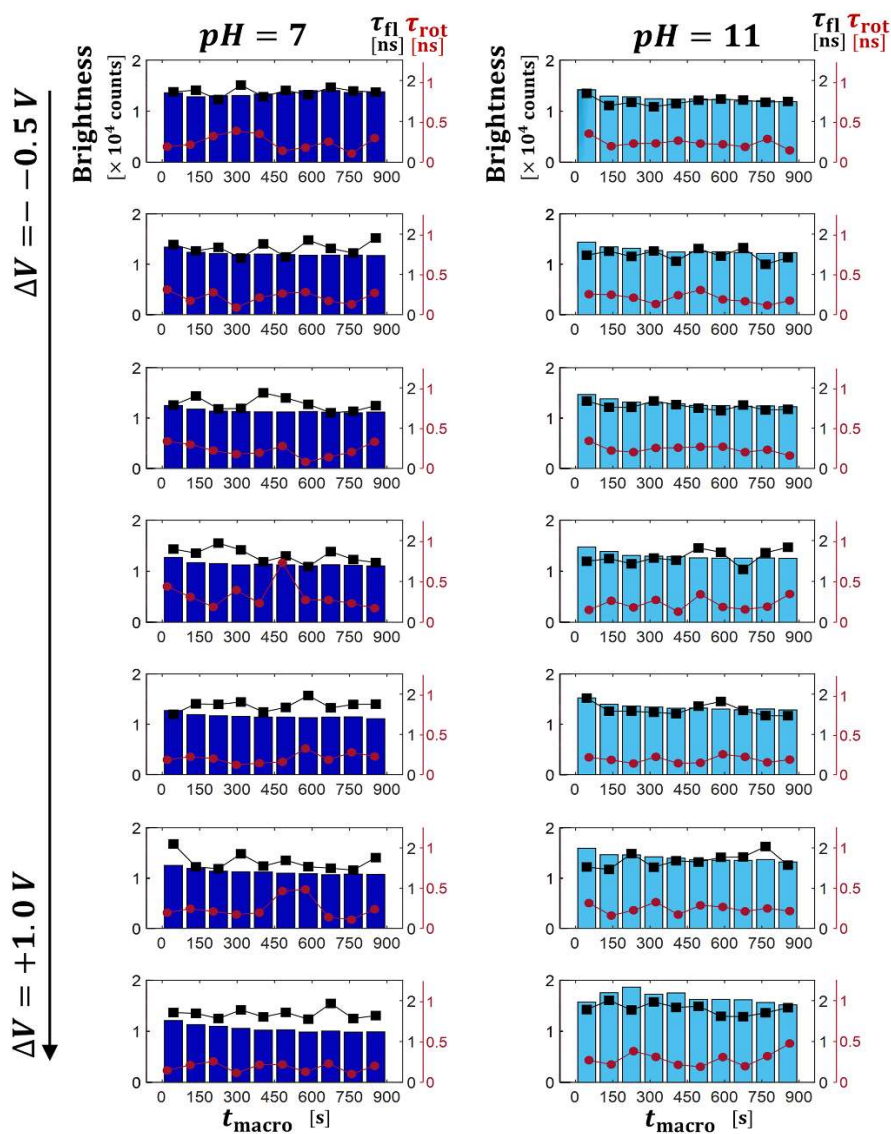

**Figure S11.** Low ionic strength behavior of the time-resolved photoluminescence of adsorbed FITC-PLL on ITO as a function of voltage and pH, equivalent to data for high ionic strength solutions in **Fig. 3**. Brightness trends for FITC-PLL adsorbed on ITO as a function of interfacial voltage while submerged in a pH=7 buffer (left), or a pH=11 buffer (right). Bars represent brightness, black squares are the fluorescence lifetime, and red circles are rotational diffusion time.

At this lower ionic strength, FITC-PLL adsorbates in contact with low- or high-pH solutions display a low amplitude of fluctuations (< 20%). Similar to the data in high ionic strength solutions, the applied electric field affects the photophysics of high pH samples, with little effects on the properties of samples at low pH (**Fig. S12**).

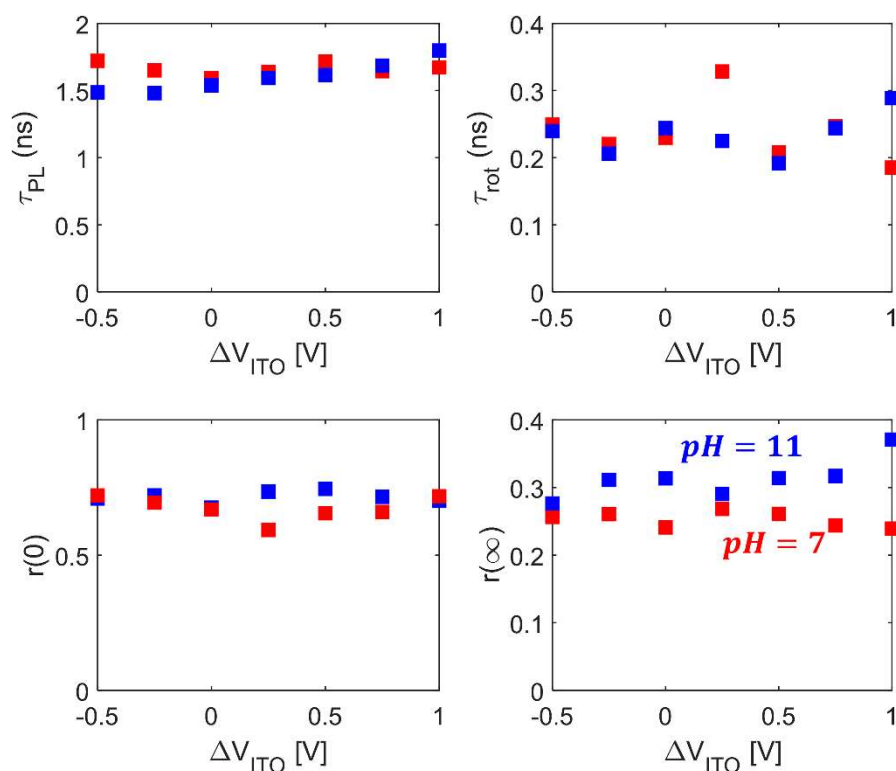

**Figure S12.** At lower ionic strength, the voltage dependent photophysics of FITC-PLL display a slight increase in fluorescence lifetime  $\tau_{PL}$  and asymptotic anisotropy value  $r(\infty)$  as voltage increases at pH=11. All other parameters show no voltage dependence. Plots show the average values for each voltage; blue markers are data at pH=11, red markers are data at pH=7. Buffer ionic strength for these experiments was 50 mM.

**Safety and Hazards statement.** Hazards associated with this work are primarily due to the use of non-ionizing radiation (Class IV laser systems), as well as high power electrical equipment (DC magnetron sputtering).

## 240 **References.**

- 241 (1) Park, J. H.; Buurma, C.; Sivananthan, S.; Kodama, R.; Gao, W.; Gessert, T. A. The  
 242 Effect of Post-Annealing on Indium Tin Oxide Thin Films by Magnetron Sputtering  
 243 Method. *Applied Surface Science* **2014**, *307*, 388–392.  
 244 <https://doi.org/10.1016/j.apsusc.2014.04.042>.
- 245 (2) Wu, W.-F.; Chiou, B.-S.; Hsieh, S.-T. Effect of Sputtering Power on the Structural  
 246 and Optical Properties of RF Magnetron Sputtered ITO Films. *Semicond. Sci.*  
 247 *Technol.* **1994**, *9* (6), 1242–1249. <https://doi.org/10.1088/0268-1242/9/6/014>.
- 248 (3) Kim, H.; Horwitz, J. S.; Kushto, G.; Piqué, A.; Kafafi, Z. H.; Gilmore, C. M.; Chrisey,  
 249 D. B. Effect of Film Thickness on the Properties of Indium Tin Oxide Thin Films.  
 250 *Journal of Applied Physics* **2000**, *88* (10), 6021–6025.  
 251 <https://doi.org/10.1063/1.1318368>.
- 252 (4) Ray, S.; Banerjee, R.; Basu, N.; Batabyal, A. K.; Barua, A. K. Properties of Tin  
 253 Doped Indium Oxide Thin Films Prepared by Magnetron Sputtering. *Journal of*  
 254 *Applied Physics* **1983**, *54* (6), 3497–3501. <https://doi.org/10.1063/1.332415>.
- 255 (5) Bender, M.; Seelig, W.; Daube, C.; Frankenberger, H.; Ocker, B.; Stollenwerk, J.  
 256 Dependence of Oxygen Flow on Optical and Electrical Properties of DC-Magnetron  
 257 Sputtered ITO Films. *Thin Solid Films* **1998**, *326* (1), 72–77.  
 258 [https://doi.org/10.1016/S0040-6090\(98\)00521-5](https://doi.org/10.1016/S0040-6090(98)00521-5).
- 259 (6) Mongay, C.; Cerda, V. A Britton-Robinson Buffer of Known Ionic Strength. *Analli di*  
 260 *Chim.* **1974**, *64*, 409–412.
- 261 (7) *CRC Handbook of Chemistry and Physics*, 97th ed.; Haynes, W. M., Lide, D. R.,  
 262 Bruno, T. J., Eds.; CRC Press: Boca Raton.
- 263 (8) Synowicki, R. A. Spectroscopic Ellipsometry Characterization of Indium Tin Oxide  
 264 Film Microstructure and Optical Constants. *Thin Solid Films* **1998**, *313–314*, 394–  
 265 397. [https://doi.org/10.1016/S0040-6090\(97\)00853-5](https://doi.org/10.1016/S0040-6090(97)00853-5).
- 266 (9) Brewer, S. H.; Franzen, S. Optical Properties of Indium Tin Oxide and Fluorine-  
 267 Doped Tin Oxide Surfaces: Correlation of Reflectivity, Skin Depth, and Plasmon  
 268 Frequency with Conductivity. *Journal of Alloys and Compounds* **2002**, *338* (1), 73–  
 269 79. [https://doi.org/10.1016/S0925-8388\(02\)00217-7](https://doi.org/10.1016/S0925-8388(02)00217-7).
- 270 (10) Brewer, S. H.; Franzen, S. Indium Tin Oxide Plasma Frequency Dependence on  
 271 Sheet Resistance and Surface Adlayers Determined by Reflectance FTIR  
 272 Spectroscopy. *J. Phys. Chem. B* **2002**, *106* (50), 12986–12992.  
 273 <https://doi.org/10.1021/jp026600x>.
- 274 (11) Moutzouris, K.; Papamichael, M.; Betsis, S. C.; Stavrakas, I.; Hloupis, G.; Triantis,  
 275 D. Refractive, Dispersive and Thermo-Optic Properties of Twelve Organic Solvents  
 276 in the Visible and near-Infrared. *Appl. Phys. B* **2014**, *116* (3), 617–622.  
 277 <https://doi.org/10.1007/s00340-013-5744-3>.
- 278 (12) Hale, G. M.; Querry, M. R. Optical Constants of Water in the 200-Nm to 200-Mm  
 279 Wavelength Region. *Appl. Opt., AO* **1973**, *12* (3), 555–563.  
 280 <https://doi.org/10.1364/AO.12.000555>.
- 281 (13) Weber, M. J. *Handbook of Optical Materials*; 2003.
- 282 (14) Optical Glass Data Sheets. SCHOTT.
- 283 (15) Mathar, R. J. Refractive Index of Humid Air in the Infrared: Model Fits. *J. Opt. A:*  
 284 *Pure Appl. Opt.* **2007**, *9* (5), 470–476. <https://doi.org/10.1088/1464-4258/9/5/008>.
- 285 (16) Handelman, A.; Apter, B.; Shostak, T.; Rosenman, G. Peptide Optical Waveguides.  
 286 *Journal of Peptide Science* **2017**, *23* (2), 95–103. <https://doi.org/10.1002/psc.2944>.

- 287 (17) Zhao, H.; Brown, P. H.; Schuck, P. On the Distribution of Protein Refractive Index  
288 Increments. *Biophys J* **2011**, *100* (9), 2309–2317.  
289 <https://doi.org/10.1016/j.bpj.2011.03.004>.  
290 (18) Mirtič, A.; Grdadolnik, J. The Structure of Poly-L-Lysine in Different Solvents.  
291 *Biophysical Chemistry* **2013**, *175–176*, 47–53.  
292 <https://doi.org/10.1016/j.bpc.2013.02.004>.  
293
